**Results:** Out of 2802 consecutive IBD outpatients visited in the index period, AZA was prescribed to 433 patients, 236 (54.5%) were affected by Crohn's disease (CD) and 197 (45.5%) by ulcerative colitis (UC). One hundred and seventy-nine patients with a follow-up < 84 months were excluded from the study. Two hundred and fifty-four patients were evaluated, 141 (55.5%) with CD and 113 (44.5%) with UC. One hundred and thirty-nine (54.7%) were male and 115 (45.3%) female (average age of  $35.62 \pm 14.20$  SD years, range 14–74 y.). Seven year after the institution of treatment, 127 (50%) patients still were in steroid-free remission (83 CD vs. 44 UC, 58.8% and 38.9%, respectively,  $p = 0.0024$ ), 71 (27.9%) had a relapse requiring retreatment with steroids (29 CD vs. 42 UC, 20.6% and 37.2%, respectively,  $p = 0.0047$ ), 56 (22.1%) discontinued the treatment due to side effects (29 CD vs. 27 UC, 20.6% and 23.9%, respectively). Loss of response from first to seventh year of follow-up was low, about 20%.

**Conclusions:** Seven year after the onset of treatment 50% of patients did not require further steroid courses. After the first year loss of response was low in six subsequent years. In the present series the maintenance of steroid-free remission was significantly higher in CD than in UC patients. The occurrence of side effects leading to the withdrawal of AZA treatment has been low.

## P544

### Impact of patient education on switch acceptance in IBD patients in remission, with infliximab originator switched for an infliximab biosimilar: a prospective study

A. Hastier-De Chelle, V. Cluzeau, J. Condat, N. Arab, X. Hébuterne, J. Filippi  
Hôpital Archet 2, Alpes-Maritimes, Nice, France

**Background:** CT-P13, the first biosimilar to infliximab (IFX), has an efficacy and tolerance profile comparable to IFX originator, at a lower cost. Physicians are thus strongly encouraged to propose a biosimilar. However, for patients, the switch from IFX originator to a biosimilar is not always accepted. The aim of this study was to evaluate the impact of patient education (PE) on the acceptance of a switch from IFX originator to biosimilar in IBD patients treated with IFX originator.

**Methods:** In a monocentric prospective study, all IBD adult patients treated with IFX originator between June 2017 and June 2018, in clinical remission for at least 6 months, were asked to complete a questionnaire specifically designed for this study, to assess their knowledge on biosimilars and their acceptance of a switching strategy. Patients had the choice whether or not to accept the switch, with or without PE. The primary endpoint was the percentage of patients who accepted the switch, after receiving a PE session due to an initial refusal. Secondary endpoints were the evaluation of patient knowledge and feeling regarding biosimilar treatment; clinical remission, based on the Harvey–Bradshaw Index (score < 4) for CD and the partial Mayo score (< 2) for UC; biological remission: C reactive protein ( $N < 5$  mg/l) and faecal calprotectin ( $N < 150$  µg/g stool) and immunogenicity after the switch, trough levels of IFX (TLI) and anti-IFX antibodies (ATI).

**Results:** 86 patients (median age: 44 years [19–79]) were included (36% UC and 64% CD). The switch was initially refused by 47% of patients. In this subgroup, 78% agreed to participate in an educational interview with the PE nurse; 68% finally accepted the switch.

At Week 16, the persistence on biosimilar was 91%. At weeks 0, 8 and 16, respectively, Mayo score was  $0.68 \pm 0.69$ ,  $0.81 \pm 0.95$  and  $0.57 \pm 0.76$  ( $p = 0.733$ ) and Harvey–Bradshaw score was  $0.88 \pm 1.70$ ,  $1.95 \pm 2.27$  and  $2.14 \pm 2.36$  ( $p = 0.134$ ); CRP was  $2.92 \pm 4.52$ ,  $3.48 \pm 5.99$  and  $4.33 \pm 10.82$  ( $p = 0.724$ ); faecal calprotectin was  $291 \pm 402$ ,  $418 \pm 596$  and  $427 \pm 459$  ( $p = 0.745$ ); TLI was  $5.00 \pm 3.98$ ,  $4.81 \pm 3.97$  and  $4.44 \pm 3.34$  ( $p = 0.642$ ); no patients had immunisation after the switch; IBDQ was  $182.61 \pm 28$  at W0 and  $175 \pm 34$  for at W16 ( $p = 0.494$ ). The evaluation on the knowledge of biosimilars at W0 showed that 77% of patients had never heard about it, 85% were in favour of the switch and 61% expressed fears about their use. At Week 16, the same evaluation showed that 84% of patients said they knew about biosimilars, 93% were in favour of the switch and 39% were still concerned about their use.

**Conclusions:** This study confirms the safety of switching infliximab by CT-P13 and demonstrates for the first time that PE plays a key role in switch acceptance by patients.

## P545

### Elderly patients with inflammatory bowel disease (IBD) are less likely to persist on anti-TNF therapy compared with younger patients: data from the Sicilian Network for Inflammatory Bowel Diseases (SN-IBD)

S. Porcari<sup>1</sup>, O. Fidanza<sup>1</sup>, A. Alibrandi<sup>2</sup>, S. Renna<sup>3</sup>, M. Cappello<sup>4</sup>, S. Siringo<sup>5</sup>, A. Privitera<sup>6</sup>, G. Insera<sup>7</sup>, F. Mocciano<sup>8</sup>, G. Magri<sup>9</sup>, A. Carroccio<sup>10</sup>, N. Belluardo<sup>11</sup>, C. Bertolami<sup>12</sup>, S. Garufi<sup>13</sup>, M. Ventimiglia<sup>3</sup>, F. Macaluso<sup>3</sup>, A. Viola<sup>14</sup>, M. Cottone<sup>15</sup>, A. Orlando<sup>3</sup>, W. Fries<sup>\*16</sup>

<sup>1</sup>Inflammatory Bowel Disease Unit, A.O.U. Policlinico 'G. Martino', Messina, Italy, <sup>2</sup>University of Messina, Department of Economics, Unit of Statistical and Mathematical Sciences, Messina, Italy, <sup>3</sup>Inflammatory bowel disease Unit, A.O.O.R. 'Villa Sofia-Cervello', Palermo, Italy, <sup>4</sup>Gastroenterology and Hepatology Unit, A.O.U. Policlinico 'G. Giaccone', Palermo, Italy, <sup>5</sup>Gastroenterology Unit, A.R.N.A.S. 'Garibaldi', Catania, Italy, <sup>6</sup>Inflammatory Bowel Disease Unit, A.O. 'Cannizzaro', Catania, Italy, <sup>7</sup>Internal Medicine Unit, A.O.U. Policlinico 'Vittorio Emanuele', Catania, Italy, <sup>8</sup>Gastroenterology and Endoscopy Unit, A.R.N.A.S. 'Civico Di Cristina Benfratelli', Palermo, Italy, <sup>9</sup>Gastroenterology Unit, A.O. 'Santa Marta e S. Venera', Acireale (CT), Italy, <sup>10</sup>Internal Medicine Unit, A.O. 'Giovanni Paolo II', Sciacca (AG), Italy, <sup>11</sup>Gastroenterology Unit, A.O. 'Guzzardi', Vittoria (RG), Italy, <sup>12</sup>Gastroenterology Unit, A.O.O.R. 'Papardo Piemonte', Messina, Italy, <sup>13</sup>Gastroenterology Unit, A.O.O.R. 'S. Elia- M. Raimondi', Caltanissetta, Italy, <sup>14</sup>Inflammatory Bowel Disease Unit, A.O.U. Policlinico 'G. Martino', Messina, Italy, <sup>15</sup>Inflammatory Bowel Disease Unit, A.O.O.R. 'Villa Sofia-Cervello', Messina, Italy, <sup>16</sup>University of Messina, Department of Clinical and Experimental Medicine, Messina, Italy

**Background:** Elderly patients with IBD are frequently difficult to treat because they are at increased risk for severe adverse events when treated with immunomodulators or anti-TNF therapies. Moreover, little is known about their response to biological treatments. The aim of this study was to compare persistence on therapy during the first course on anti-TNF treatments in IBD patients over 60 years of age with that of younger IBD patients.
